# Supplementary material for: Solubilized Formulations of Triphenylphosphine Derivatives of Allylbenzenes and Their Potential as Individual Antitumor Agents or Adjuvants to Paclitaxel
Source: Preprints.org preprint supplement (doi:10.20944/preprints202310.2054.v1), 2023-10-31
Supplement: Supplementary file 1 [file supplementary]

Solubilized formulations of triphenylphosphine derivatives of allylbenzenes and their potential as individual antitumor agents or adjuvants to Paclitaxel

**Igor D. Zlotnikov 1, Sergey S. Krylov 2, Marina N. Semenova 3, Victor V. Semenov 2 and Elena V. Kudryashova 1,***

1 Faculty of Chemistry, Lomonosov Moscow State University, Leninskie Gory, 1/3,
119991 Moscow, Russia; zlotnikovid@my.msu.ru (I.D.Z.);

2 N. D. Zelinsky Institute of Organic Chemistry RAS, 47 Leninsky Prospect, 119991 Moscow, Russia; [forvard1953@yandex.ru](mailto:forvard1953@yandex.ru) (S.S.K.); [vs@chemical-block.com](mailto:vs@chemical-block.com) (V.V.S.)

3 N. K. Koltzov Institute of Developmental Biology RAS, 26 Vavilov Street, 119334 Moscow, Russia; ms@chemical-block.com

***** Correspondence: helenakoudriachova@yandex.ru (E.V.K.)

**Figure S1.** 1H NMR spectra of (a) dillapiol, (b) dillapiol-PPh3, (c) myristicin, (d) myristicin-PPh3. T = 25 °C. d6-DMSO. 400 MHz.

| 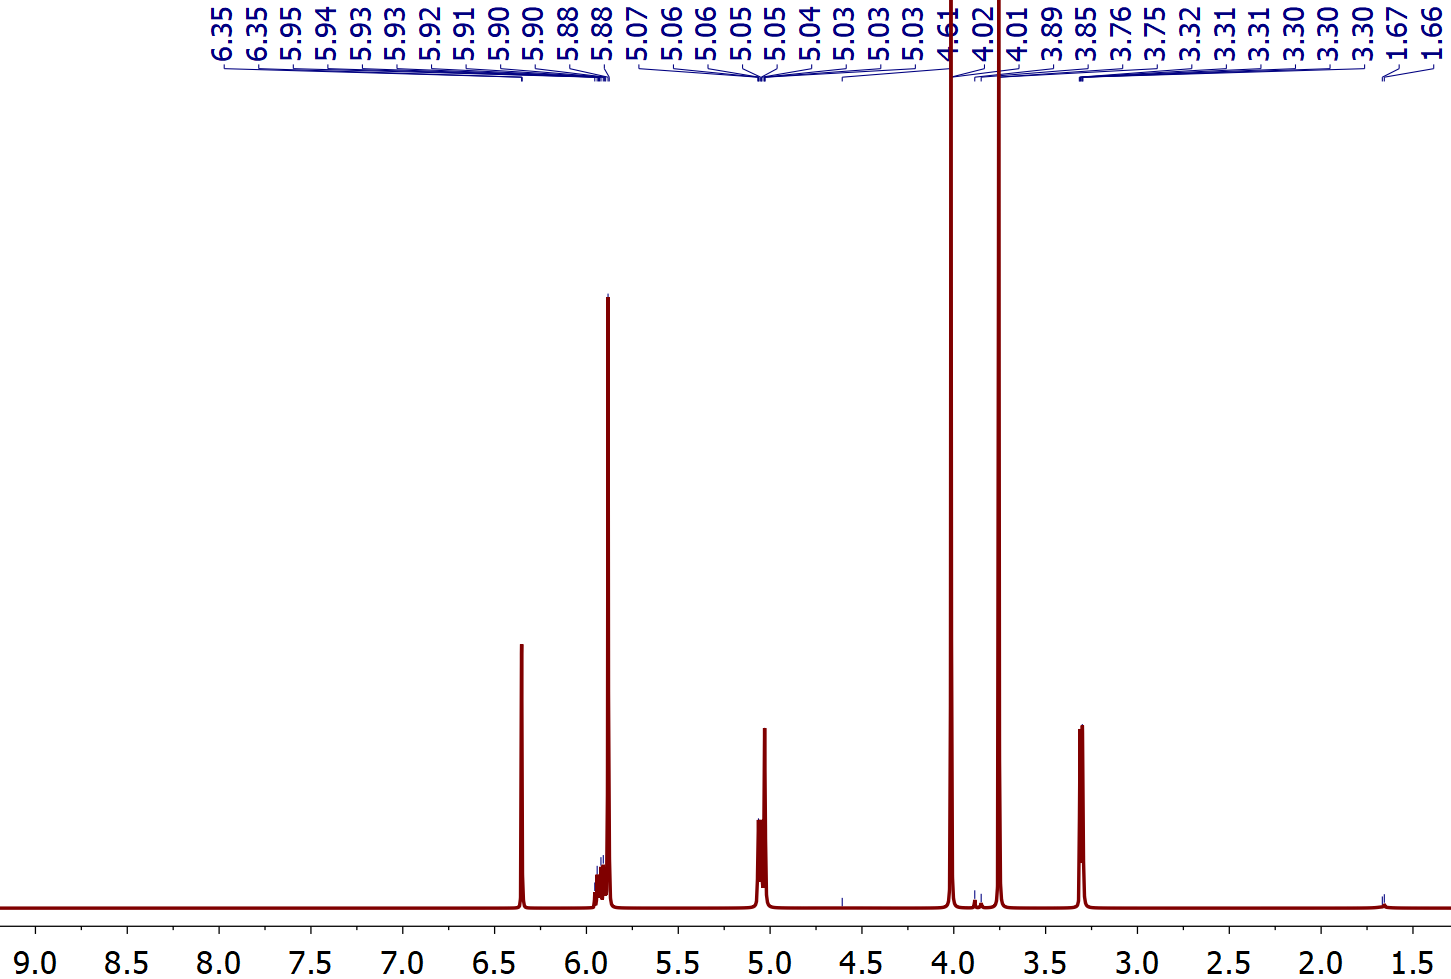 |
| --- |
| **(a)** |
| 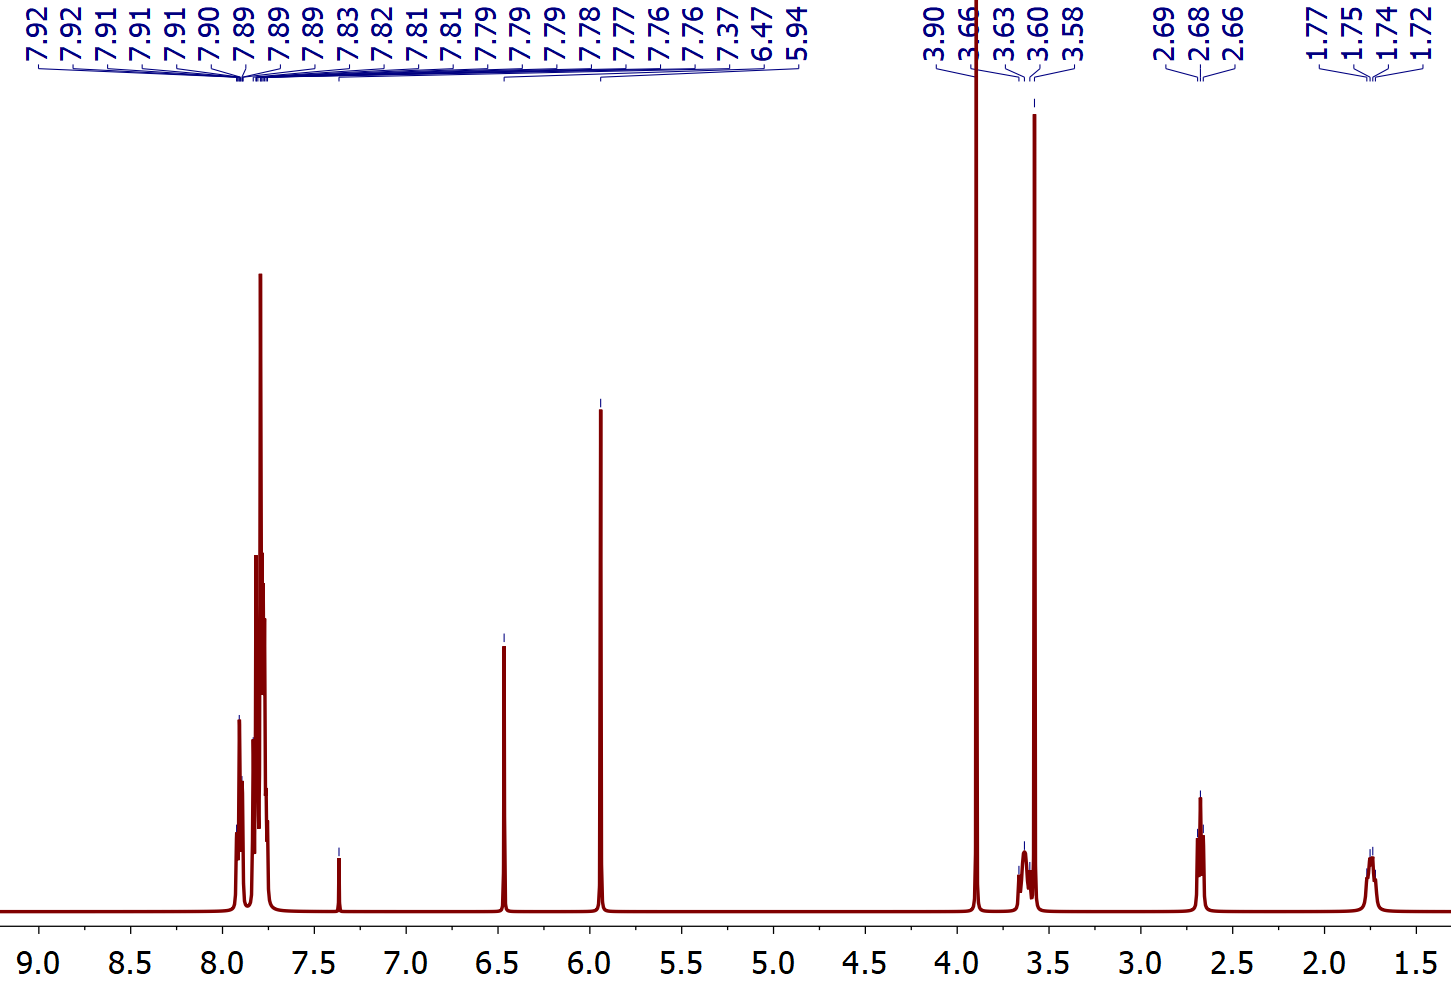 |
| **(b)** |
| 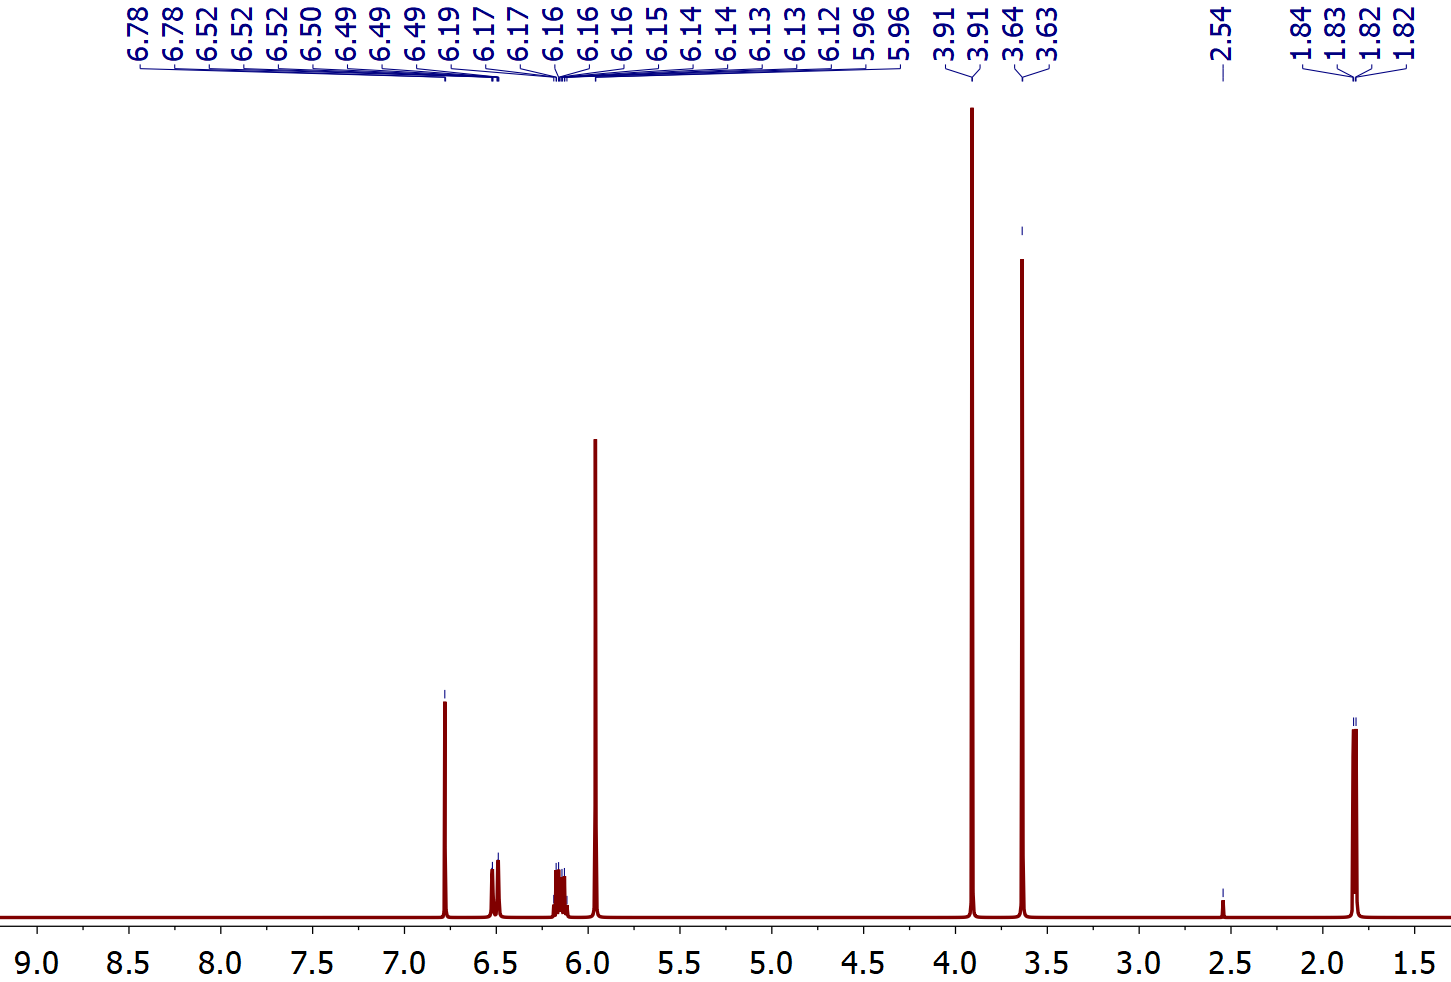 |
| **(c)** |
| 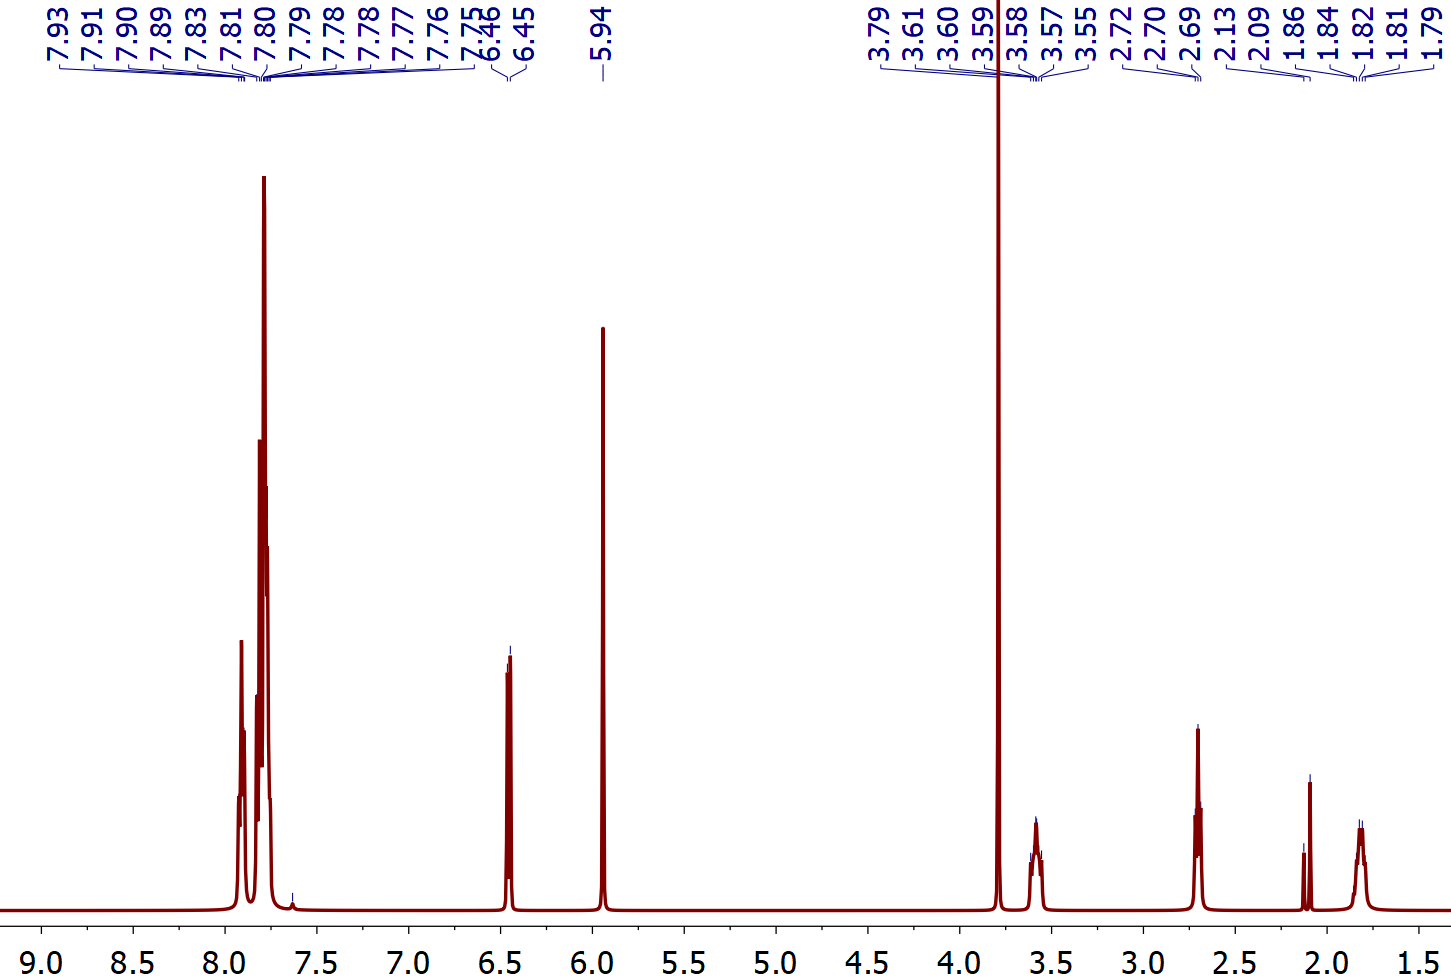 |
| **(d)** |
